# Supplementary material for: Residues 2 to 7 of α-synuclein regulate amyloid formation via lipid-dependent and lipid-independent pathways
Source: PubMed Central journal article supplement (PMC11348338; doi:10.1073/pnas.2315006121), 2024-08-12
Supplement: pnas.2315006121.sapp.pdf [file pnas.2315006121.sapp.pdf]

1  
2  
3  
4  
5  
6  
7  
8  
9  
10  
11  
12  
13  
14  
15  
16  
17  
18  
19  
20  
21  
22  
23  
24  
25  
26  
27

## Supporting Information for

### Residues 2-7 of $\alpha$ -synuclein regulate amyloid formation via lipid-dependent and -independent pathways

Katherine M. Dewison<sup>1</sup>, Benjamin Rowlinson<sup>1</sup>, Jonathan M. Machin<sup>1</sup>, Joel A. Crossley<sup>1</sup>, Dev Thacker<sup>1</sup>, Martin Wilkinson<sup>1</sup>, Sabine M. Ulamec<sup>1</sup>, G. Nasir Khan<sup>1</sup>, Neil A. Ranson<sup>1</sup>, Patricija van Oosten-Hawle<sup>2</sup>, David J. Brockwell<sup>1,\*</sup>, Sheena E. Radford<sup>1,\*</sup>

<sup>1</sup> Astbury Centre for Structural Molecular Biology, School of Molecular and Cellular Biology, Faculty of Biological Sciences, University of Leeds, Leeds LS2 9JT, United Kingdom

<sup>2</sup> Department of Biological Sciences, University of North Carolina at Charlotte, Charlotte, NC, USA

\* **Corresponding authors:** Sheena E. Radford; David J. Brockwell

**Email:** S.E.Radford@leeds.ac.uk; D.J.Brockwell@leeds.ac.uk

#### This PDF file includes:

Supporting text, Methods

Figures S1 to S16

Tables S1 to S6

## 28 **SI Appendix, Materials and Methods**

29

### 30 **$\alpha$ Syn $\Delta$ N7 and alanine scan mutants molecular cloning**

31 The plasmids for  $\alpha$ Syn $\Delta$ N7 and alanine scan mutants used for recombinant protein expression in *E.*  
32 *coli* was derived from a pET23a vector encoding  $\alpha$ SynWT (kindly provided by Professor Jean Baum,  
33 Department of Chemistry and Chemical Biology, Rutgers University, NJ, USA). Q5 site-directed  
34 mutagenesis (NEB), followed by a kinase, ligase, DpnI (KLD) treatment was carried out on the  
35  $\alpha$ SynWT plasmid. Primers to generate  $\alpha$ Syn $\Delta$ N7 were designed to delete the DNA sequence  
36 corresponding to residues 2-7 (<sup>2</sup>DVFMKG<sup>7</sup>) of  $\alpha$ Syn. Primers for the alanine scan mutants were  
37 designed such that the amino acid at each of the positions from 2-7 would be mutated to an alanine.  
38 Successful deletion/mutation was confirmed by transformation of *E. coli* DH5 $\alpha$  cells, Miniprep  
39 (Qiagen), and subsequent sequencing (Source Bioscience).

40

### 41 **Recombinant protein expression and purification**

42 Competent *E. coli* BL21 (DE3) cells were transformed by heat-shock at 42 °C with the pET23a vectors  
43 discussed above. Cells were plated on 100  $\mu$ g/mL carbenicillin LB agar plates and grown at 37°C  
44 overnight. A 100 mL LB medium starter culture containing 100  $\mu$ g/mL carbenicillin was inoculated with  
45 a single colony and incubated at 37 °C, 200 rpm shaking overnight. For <sup>15</sup>N-labelled protein, 100 mL  
46 LB was inoculated (with 100  $\mu$ g/mL carbenicillin) and eight hours later cells were pelleted and  
47 resuspended in 500 mL HCDM1 medium (10 g K<sub>2</sub>HPO<sub>4</sub>, 10 g KH<sub>2</sub>PO<sub>4</sub>, 7.5 g Na<sub>2</sub>HPO<sub>4</sub>, 9 g K<sub>2</sub>SO<sub>4</sub>, 1  
48 g <sup>15</sup>N-labelled NH<sub>4</sub>Cl per 1 L culture, supplemented with 2mM MgCl<sub>2</sub>, 100  $\mu$ M CaCl<sub>2</sub>, 4 g/L glucose  
49 and 100  $\mu$ g/mL carbenicillin) such that the starting OD<sub>600</sub> = ~ 0.04. The culture was then incubated at  
50 37 °C, 200 rpm shaking overnight. The following day, 1 L medium (LB or HCDM1) was inoculated  
51 with 15 mL starter culture and grown at 37 °C, 200 rpm shaking. When the culture reached OD<sub>600</sub> of  
52 0.6, protein expression was induced with addition of 1 mM isopropyl- $\beta$ -D-thio-galactopyranoside  
53 (IPTG). Cultures were then grown for an additional 4 h before harvesting the cells.

54

55 Cells were harvested at 5,000 r.p.m. for 30 min (rotor JA 8.1.) at 4 °C. The cell pellet was then  
56 resuspended in lysis buffer (20 mM Tris-HCl pH 8.0, 2 mM MgCl<sub>2</sub>, 5 mM DTT, 1 mM PMSF, 2 mM  
57 benzamidine, 100  $\mu$ g/ml lysozyme, and 20  $\mu$ g/ml DNase) using 25 mL lysis buffer per 1 L culture  
58 equivalent. The cell pellet was homogenised and incubated for 30 min on a roller at room temperature.  
59 The lysates were then heated at 80 °C for 10 min before centrifugation at 35,000 x *g* for 30 min. 30  
60 % (w/v) ammonium sulphate was added to the resulting supernatant fraction and left to incubate on

61 a roller for 30 min at 4 °C to precipitate the protein. The protein was then pelleted at 35,000 x g for 30  
62 min at 4 °C and the supernatant was discarded. The 30 % (w/v) ammonium sulphate precipitation  
63 step (30 min, 4 °C) and subsequent centrifugation step (35,000 x g, 30 min, 4 °C) was repeated and  
64 the remaining pellet was stored at -20 °C until further processing.

65

66 The protein pellet was resuspended in 20 mM Tris-HCl, pH 8.0 wash buffer (1 L culture equivalent  
67 was resuspended in 100 mL buffer). The resuspended protein was loaded onto a manually packed  
68 Q-Sepharose anion exchange column (~80 mL). The column was washed with two column volumes  
69 (CV) of wash buffer, before eluting the protein using a gradient of 0-500 mM NaCl over two CV. The  
70 column was then washed with two CV 500 mM NaCl then two CV 1 M NaCl. The  $\alpha$ Syn-containing  
71 fractions were pooled and dialysed into 5 mM ammonium bicarbonate. The partially-purified protein  
72 was lyophilised and stored at -20 °C until further processing.

73

74 Next, the protein was resuspended in PBS buffer (137 mM NaCl, 2.7 mM KCl, 8.1 mM Na<sub>2</sub>HPO<sub>4</sub> and  
75 1.5 mM KH<sub>2</sub>PO<sub>4</sub>; pH 7.4) at a concentration of 2 mg/mL and loaded onto a HighLoad™26/60 Superdex  
76 75 pg gel filtration column. 5 mL injections were loaded using a 50 mL superloop. Peaks containing  
77  $\alpha$ Syn were pooled and dialysed into 5 mM ammonium bicarbonate, then lyophilised and stored at -20  
78 °C.

79

### 80 **Thioflavin T (ThT) assay**

81 Lyophilised protein was dissolved in PBS at an approximate concentration of 10 mg/mL.  
82 Resuspended protein was centrifuged at 16,000 r.p.m. for 30 min at 4 °C to remove insoluble material.  
83 The protein concentration was then determined using the A<sub>280</sub> and  $\epsilon = 5,960 \text{ M}^{-1} \text{ cm}^{-1}$  for both  $\alpha$ SynWT  
84 and  $\alpha$ Syn $\Delta$ N7. To measure *de novo* fibrillation,  $\alpha$ Syn protein (100  $\mu$ M) and ThT (20  $\mu$ M) were mixed  
85 and 100  $\mu$ L was added per well of a 96-well non-binding flat-bottom assay plate (Corning). A 3 mm-  
86 diameter Teflon ball (PolySciences) was added to each well and the ThT assay was carried out at 37  
87 °C, 600 rpm orbital shaking in FLUOstar Omega Plate Reader (BMG Labtech). ThT fluorescence was  
88 then monitored using excitation at 444 nm and fluorescence emission was monitored at 480 nm. Each  
89 experiment was repeated a minimum of three times, with three replicates per experiment.

90

91 For ThT experiments with sonicated seeds, fibrils taken from the endpoint of the *de novo* fibril growth  
92 experiments were sonicated on ice using a Cole-Parmer-Ultrasonicator twice for 30 sec  
93 at 40% maximum power with a 30 sec break in between. Sonicated or unsonicated fibril seeds were

94 then added to monomeric protein (50  $\mu\text{M}$ ) at a seed concentration of 10% (v/v). Fibril growth was  
95 allowed to proceed for a further 45 h 37 °C under quiescent conditions in FLUOstar OPTIMA Plate  
96 Reader (BMG Labtech).

97 Lag times ( $T_{lag}$ ) were calculated by first fitting the following equation from (1):

98

99

$$Y = y_i + m_i t + \frac{y_f + m_f t}{1 + e^{-[(t-t_{50})/\tau]}}$$

100

101 where  $Y$  is the fluorescence intensity over time ( $t$ ).  $y_i$  and  $y_f$  are the y-intercepts of the initial and final  
102 baselines.  $m_i$  and  $m_f$  are the slopes of the initial and final baselines, respectively.  $t_{50}$  is the time taken  
103 to reach 50% of the elongation phase and  $\tau$  is the elongation time constant. The  $T_{lag}$  was then  
104 calculated using:

105

$$T_{lag} = t_{50} - 2\tau$$

106

107 Error bars on  $T_{50}$  and  $T_{lag}$  plots are standard error of the mean. To measure liposome-mediated  
108 fibrillation kinetics,  $\alpha\text{Syn}$  (50  $\mu\text{M}$ ) was incubated with DMPS liposomes (at molar ratios indicated in  
109 the text) in 20 mM sodium phosphate buffer (pH 6.5). 100  $\mu\text{L}$  was added per well of a 96-well non-  
110 binding flat-bottom assay plate (Corning). The plate was incubated at 30 °C in FLUOstar OPTIMA  
111 Plate Reader (BMG Labtech) under quiescent conditions.

112

### 113 **Pelleting assay**

114 To quantify the amount of soluble protein remaining after each fibril growth assay, the samples were  
115 centrifuged at 100,000  $\times g$  for 30 min at 4 °C to separate soluble and insoluble fractions. Whole and  
116 soluble fractions were then diluted to 8.33  $\mu\text{M}$  and 15  $\mu\text{L}$  loaded onto a 15% Tris-Tricine SDS-PAGE  
117 gel. The gel was stained with InstantBlue Coomassie stain and imaged on the Alliance Q9 Imager  
118 (Uvitec). Densitometry was carried out using the Nine-Alliance software. Error bars on figures are  
119 standard error of the mean.

120

### 121 **Negative stain transmission electron microscopy (TEM)**

122 At the end of each ThT assay, samples were applied onto an in-house prepared carbon-coated copper  
123 grid. The grid was then washed three times with 18 M $\Omega$  H $_2$ O and negatively stained with 2 % (w/v)  
124 uranyl acetate twice. Images were collected on an FEI Tecnai T12 electron microscope.

125

126 **Cryo-EM data collection**

127 100  $\mu\text{M}$  of  $\alpha\text{Syn}\Delta\text{N7}$  in PBS was incubated in a thriller shaker for a week at 37 °C, 600 rpm for  
128 fibrillation. 4  $\mu\text{L}$  was then applied onto 60s plasma cleaned (GloCube, Quorum) Lacey carbon 300  
129 mesh grids. The sample was blotted and frozen in liquid ethane using a Vitrobot Mark IV (FEI) with a  
130 0.5 s wait and 5 s blot time respectively. The Vitrobot chamber was maintained at close to 100%  
131 humidity and 4 °C. The cryo-EM dataset was collected at the University of Leeds Astbury centre using  
132 a Titan Krios electron microscope (Thermo Fisher) operated at 300 kV with a Falcon IV detector  
133 (Thermo Fisher) and Selectris energy filter set with a 10 e-V slit width (Thermo Fisher). A nominal  
134 magnification of 130,000x was set yielding a pixel size of 0.95 Å. A total of 5,464 movies were  
135 collected with a nominal defocus range of -1.4 to -2.6  $\mu\text{m}$  using a total dose of  $\sim 45 \text{ e}^-/\text{Å}^2$  over an  
136 exposure of 4.59 s, which corresponded to a dose rate of  $\sim 8 \text{ e}^-/\text{pixel}/\text{s}$ . Each movie was collected as  
137 EER frames.

138

139 **Cryo-EM data processing**

140 Each movie stack was aligned, dose weighted and summed using motion correction in RELION4 (2)  
141 and CTF parameters were estimated for each micrograph using CTFFIND v4.14 (3). Fibrils from  
142 around a hundred micrographs were manually picked in RELION and the extracted segments used  
143 to train automated filament segment picking with Topaz (4). A total of 315,777 helical segments were  
144 extracted 3x binned in RELION (box dimensions of  $\sim 76 \text{ nm}$ ) for the initial rounds of 2D classification,  
145 after which the selected segments were re-extracted un-binned (box dimensions of  $\sim 47 \text{ nm}$ ) for the  
146 third round of 2D classification. Throughout, the VDAM classification algorithm was used to separate  
147 out picking artefacts to leave 163,259 fibril segments for further processing. The  $\alpha\text{Syn}\Delta\text{N7}$  dataset  
148 was split into fibrils with (100,454) and without (62,805) distinct crossovers.

149

150 For starting 3D classification, an initial 3D template was generated from a single unbinned 2D class  
151 average using the `relion_helix_inimodel2d` command (5) along with measured helical crossover  
152 estimates from 3x binned 2D class averages. The first 3D classification run with the initial model used  
153 a fixed twist (based on the updated estimate) and rise (4.80 Å), with a t-value of 30, 1.8° sampling,  
154 and a strict high-resolution limit of 4 Å with 3 output classes. For the second round of 3D classification,  
155 helical searches of the twist were employed with a fixed rise (4.80 Å) with a t-value of 30, 0.9° sampling  
156 and a strict high-resolution limit of 4 Å with 3 output classes. In the third 3D classification run, narrow  
157 helical searches of both the twist and rise were employed with a t-value of 30, 0.9° sampling and a

158 strict high-resolution limit of 4 Å with two output classes. The most ordered class was selected from  
159 this final classification to move on to refinement.

160

161 A couple of sequential rounds of 3D refinement were needed to get the halfmaps to converge before  
162 CTF refinement of the per-particle defocus estimates, Bayesian polishing and then the final run of 3D  
163 refinement. Narrow helical searches of twist and rise were used up until the final refinement, with t-  
164 values of 15, initial sampling of 0.9° and initial lowpass-filtering of 6 Å. Post-processing with a soft  
165 mask (extended by 4 pixels and soft-edge for 6 pixels, z length of 20%) was used to obtain gold-  
166 standard (at an FSC value of 0.143) resolution estimate of the final map. The final αSynΔN7 map is  
167 at a resolution of 2.5 Å. The full collection and processing details are shown in *SI Appendix*, Table  
168 S2.

169

### 170 **Model building and refinement**

171 After docking several different published recombinant αSyn fibril structures, PDB: 6osl (6) was  
172 selected as a starting model for building in Coot (7). One chain of the template was rigid-body fitted  
173 into the density and local regions adjusted where they deviated from the map. Both Ramachandran  
174 and rotamer outliers were monitored and minimized during building in Coot. The corrected chain was  
175 copied and rigid body fit to generate a 12-chain model for 6 layers of the fibril core followed by real  
176 space refinement against the postprocessed map in Phenix v1.17.1 (8). NCS restraints were applied  
177 to prevent divergence of repeating chains in the layers along the fibril axis. The final refined model  
178 was assessed using MolProbity (9) and deposited, with the final model statistics summarised in *SI*  
179 *Appendix*, Table S2.

180

### 181 **Reversed-phase High Performance Liquid Chromatography (RP-HPLC)**

182 RP-HPLC was used to resolve αSynWT and αSynΔN7 from the soluble fraction of a co-aggregation  
183 ThT assay using a Shimadzu UK Ltd. Nexera LC-40 system. The Nucleosil 300 C4 column (Chromex  
184 Scientific Ltd.) was equilibrated with 95 % solvent A (0.1 % (v/v) trifluoroacetic acid (TFA)) and 5 %  
185 solvent B (acetonitrile and 0.1 % (v/v) TFA) at a flow rate of 1 mL/min. The sample of the endpoint  
186 from the co-incubated ThT assay was centrifuged at 100,000 x g for 30 min at 4 °C and 30 µL of the  
187 soluble fraction was injected onto the column from a polypropylene HPLC vial (Thermo Fisher). For  
188 the monomeric αSynWT and αSynΔN7 controls, lyophilised protein was freshly dissolved in PBS and  
189 resuspended protein was centrifuged at 16,000 r.p.m. for 30 min at 4 °C to remove insoluble material.  
190 Samples were eluted over an increasing gradient of solvent B (5 – 80 %) over 10 mins, then 95 %

191 solvent A for 5 mins. Protein was detected at a wavelength of 280 nm by photodiode array detection.  
192 The peaks were identified using LabSolutions software provided with the instrument.

193

### 194 **Generation of liposomes**

195 DMPS lipids (Avanti) stored at -20 °C were removed from the freezer and allowed to reach room  
196 temperature. Lipids were dissolved in 20% (v/v) methanol and 80% (v/v) chloroform. One or two days  
197 before each experiment, the lipids were desiccated using a 45 °C water bath under a gentle stream  
198 of N<sub>2</sub> gas, and placed in a vacuum chamber overnight. The following day, desiccated lipids were  
199 resuspended in 20 mM sodium phosphate buffer, pH 6.5 at a concentration of 40 mM. Lipids were  
200 extruded using a 100 nm membrane. Dynamic light scattering (DLS) was used to calculate the radius  
201 of the liposomes to be ( $-64 \pm 1$  nm).

202

### 203 **Circular dichroism (CD)**

204 CD experiments were carried out using an Applied Photophysics Chiroscan spectrometer. Spectra  
205 were acquired using a 2.0 nm bandwidth and 1.0 mm path length cuvettes. All CD spectra were  
206 acquired at 30 °C.  $\alpha$ Syn monomer was dissolved in 20 mM sodium phosphate buffer (pH 6.5) at a  
207 concentration of 25  $\mu$ M and incubated with liposomes (at LPRs ranging from 0:1 to 100:1) for 3 min  
208 at 30 °C. Spectra for each sample were acquired three times, and data were blank-corrected,  
209 averaged and converted from mdeg to mean residue ellipticity (MRE) values. This experiment was  
210 repeated three times.

211

212 Binding affinity ( $K_d$ ) and stoichiometry values ( $L$ ) were calculated by fitting the equation described in  
213 (10):

$$214 \quad X_B = \frac{\left([\alpha Syn] + \frac{[DMPS]}{L} + K_d\right) - \sqrt{\left([\alpha Syn] + \frac{[DMPS]}{L} + K_d\right)^2 - \frac{4[DMPS][\alpha Syn]}{L}}}{2[\alpha Syn]}$$

215

216 where  $X_B$  is the fraction of  $\alpha$ Syn bound to the membrane and can be expressed as:

217

$$218 \quad X_B = \frac{CD_{obs} - CD_F}{CD_B - CD_F}$$

219

220 where  $CD_{obs}$  is the observed CD signal at 222 nm, and  $CD_F$  and  $CD_B$  are the CD signals of free and  
221 bound  $\alpha$ Syn, respectively.

222

223 To calculate the percentage helicity of  $\alpha$ SynWT and  $\alpha$ Syn $\Delta$ N7, the following equation from (11) was  
224 used:

$$225 \quad \text{Percentage helicity} = 100 \times \frac{\theta_{222nm}^{exp} - \theta_{222nm}^u}{\theta_{222nm}^h - \theta_{222nm}^u}$$

226 where  $\theta_{222nm}^u$  and  $\theta_{222nm}^h$  correspond to the ellipticity of a protein with 0% and 100% helical content,  
227 respectively. These values have been estimated to be  $-3,000 \text{ deg.cm}^2.\text{dmole}^{-1}$  ( $\theta_{222nm}^u$ ) and  $-39,500$   
228  $\text{deg.cm}^2.\text{dmole}^{-1}$  ( $\theta_{222nm}^h$ ).  $\theta_{222nm}^{exp}$  is the observed ellipticity under saturating conditions.

229

### 230 **NMR experiments**

231 2D ( $^1\text{H}$ ,  $^{15}\text{N}$ ) heteronuclear multiple quantum coherence (HMQC) spectra were recorded at 20 °C, 30  
232 °C and 40 °C using a AVANCE III Bruker spectrometer (600 MHz) equipped with a triple channel QCI-  
233 P cryoprobe. Spectra were recorded on samples of 25  $\mu\text{M}$  [ $\text{U-}^{15}\text{N}$ ] WT  $\alpha$ SynWT,  $\alpha$ Syn $\Delta$ N7 or  
234  $\alpha$ Syn $\Delta$ P1 in 20 mM sodium phosphate buffer, pH 6.5, 10% (v/v)  $\text{D}_2\text{O}$  in the absence or presence of  
235 DMPS liposomes (~100 nm diameter) at an LPR of 8:1. All spectra were processed using Topspin  
236 3.7.0 and analysed using CCPN analysis software (12). Published assignments of  $\alpha$ SynWT (BMRB  
237 16543) (13) were transferred to the data for  $\alpha$ Syn $\Delta$ N7 and  $\alpha$ Syn $\Delta$ P1 at 20 °C. Assignments could  
238 then be transferred to spectra collected at higher temperatures by following peak positions at different  
239 temperatures and assuming a linear relationship between temperature and chemical shift for a given  
240 peak (14). Peak heights were used to calculate intensity ratios for peaks in the absence and presence  
241 of lipid.

242

### 243 **DPH assay**

244 1,6-diphenyl-1,3,5-hexatriene (DPH) was dissolved at room temperature by stirring overnight in 100%  
245 ethanol to make a stock concentration of 2 mM. DPH was then added to DMPS liposomes at a molar  
246 ratio of 1:600 [DPH]:[DMPS] and the mix was placed at 45 °C for 30 min to allow incorporation of the  
247 DPH into the lipid bilayer. This dye integrates into the lipid acyl chains and reports on lipid fluidity via  
248 measurement of its fluorescence polarisation (15). The DMPS-DPH mix was then added to  $\alpha$ SynWT  
249 or  $\alpha$ Syn $\Delta$ N7 monomers (final concentration of 50  $\mu\text{M}$  protein), and a final LPR of 60:1 or 8:1. The final  
250 concentration of ethanol in the sample was 0.025% (v/v). Fluorescence polarisation was measured  
251 on a PTI Quantmaster Series fluorometer. DPH fluorescence was excited at 355 nm with



252 fluorescence emission collected at 430 nm. The fluorescence polarisation was acquired at 1 °C  
253 intervals from 10 to 60 °C, with a 2 min equilibration at each temperature and a 5 sec integration time.  
254 Milli polarisation (mP) was calculated by:

$$255 \quad mP = 1000 \times \frac{I_{VV} - G \times I_{VH}}{I_{VV} + G \times I_{VH}}$$

256  
257 where  $I_{VV}$  is the measured intensity of emitted fluorescence with the excitation polarisers in the  
258 vertical (i.e. 0 °) position and the emission polariser also in the vertical position.  $I_{VH}$  is the same as  $I_{VV}$ ,  
259 but with the emission polariser in the horizontal position (i.e. 90 °). G is the G factor, given as:

$$260 \quad G = \frac{I_{HV}}{I_{HH}}$$

261  
262 where  $I_{HV}$  is the measured fluorescence intensity with the excitation polariser in the horizontal position  
263 and emission polariser in the vertical position.  $I_{HH}$  is the same as  $I_{HV}$  but with the emission polariser in  
264 the horizontal position.

265

### 266 **C. *elegans* strain generation and maintenance**

267 The NL5901 strain (expressing *unc-54p::αSynWT::YFP*) and the pPD30.38 vector encoding *unc-*  
268 *54p::αSynWT::YFP* was kindly provided by Professor Ellen Nollen (University of Groningen,  
269 Netherlands). The *unc-54p::αSynΔN7::YFP* strain was generated by Gateway® cloning (Invitrogen).  
270 The BP reaction was used to generate the *αSynΔN7* entry clone. For the LR reaction, the entry clones  
271 containing *αSynΔN7* was combined with pDONR™P4-P1R and pDONR™ P2RP3 vectors containing  
272 *unc-54p* and *YFP*, respectively. The product of the LR reaction was used to transform DH5α cells and  
273 the expression vector was checked by sequencing. This construct was used to generate the  
274 transgenic *C. elegans* strains by microinjection into the N2 nematodes, resulting in the generation of  
275 the strain PVH247. *C. elegans* strains were maintained using standard methods at 20 °C with *E. coli*  
276 OP50-1 as a food source.

277

### 278 **Western blotting to quantify protein expression levels**

279 ~400 *C. elegans* worms were collected and placed into M9 solution. Nematodes were pelleted by a  
280 brief centrifugation, and washed with M9 solution three times. The remaining pellet was resuspended  
281 in 20 μL lysis buffer (20 mM Tris-HCl, pH 7.5; 10 mM β-mercaptoethanol; 0.5% (v/v) Triton X-100;  
282 supplemented with complete protease inhibitor (Roche)). The samples were snap-frozen in liquid  
283 nitrogen and freeze-thawed three times. The *C. elegans* worms in the samples were then lysed on

284 ice using a motorised pestle. The samples were then centrifuged at 1000 x g for 1 min and the  
285 supernatant containing the worm lysate was collected. The protein concentration of each sample was  
286 calculated using a Bradford assay (Thermo Fisher). Lysates were diluted to 1 µg/µL and mixed with  
287 2x SDS loading buffer (2 % (w/v) SDS, 10 % (v/v) glycerol, 0.1 % (w/v) bromophenol blue, 100 mM  
288 DTT) and boiled for 10 min. 15 µg of protein was loaded onto a 4-20 % Tris-glycine gel (Bio-Rad).  
289 Protein from the gel was transferred to a PVDF membrane. The blot was blocked with 5% (w/v) milk  
290 in tris-buffered saline with 0.1% (v/v) Tween-20 (TBST), and αSynWT/ΔN7::YFP was visualised with  
291 a mouse anti-GFP antibody (1:1000) (BioLegend clone B34, 902601). A mouse anti-tubulin antibody  
292 (1:5000) (Sigma clone DM1A monoclonal, T9026) was used to detect the tubulin loading control. Both  
293 anti-GFP and anti-tubulin were visualised with an anti-mouse horseradish peroxidase-coupled  
294 secondary antibody (1:5000) (Cell Signalling Technology, 7076S). Bands were visualised with  
295 Supersignal™ West Pico PLUS Chemiluminescent Substrate.

296

### 297 **Confocal imaging and aggregate quantification**

298 *C. elegans* were bleach synchronised and imaged at day 1, 4 or 8 of adulthood for confocal imaging  
299 experiments. Nematodes were immobilised on 2 % (w/v) agarose pads with 25 mM sodium azide.  
300 The head regions of *C. elegans* were imaged using a Zeiss LSM880 confocal microscope at a  
301 magnification of 40 x 1.0 numerical aperture objective. YFP was visualised using an excitation at 514  
302 nm. Z-stacks through the head region were collected for 15-20 worms per experimental condition.  
303 Aggregate quantification (from the tip of the nematode to the end of the terminal pharyngeal bulb)  
304 was carried out in ImageJ using a partially-automated analysis pipeline, where puncta larger than 1  
305 µm<sup>2</sup> were considered as aggregates. The results from three biological repeats were collated and error  
306 bars shown on graphs are SEM. A two-way ANOVA couple with a post-hoc Šidák multiple  
307 comparisons test was carried out in GraphPad Prism 8 to determine statistical significance.

308

### 309 ***C. elegans* motility assay**

310 Age synchronised nematodes were transferred to drop of M9 on an unseeded NGM plate. *C. elegans*  
311 thrashing was recorded on a camera attached to the microscope eyepiece for 15 sec each time. A  
312 minimum of 20 worms were videoed per condition. The thrashing rates were calculated using the  
313 wrMTrck plugin on ImageJ (16). The experiment was repeated three times for each age. A two-way  
314 ANOVA couple with a post-hoc multiple comparisons Tukey test was carried out in GraphPad Prism  
315 8 to determine statistical significance.

316

317 ***C. elegans* lifespan assay**

318 *C. elegans* nematodes were transferred to freshly seeded NGM plates at day 1 of adulthood (120-  
319 150 animals per condition). Nematodes were scored each day as alive, dead or censored until none  
320 were left alive. *C. elegans* were transferred to new seeded NGM plates every other day to maintain a  
321 synchronised population and prevent starvation. The experiment was repeated three times and the  
322 results plotted using a Python script adapted from Lifelines (17).

323

324 **SI Appendix Figures and Figure Legends**

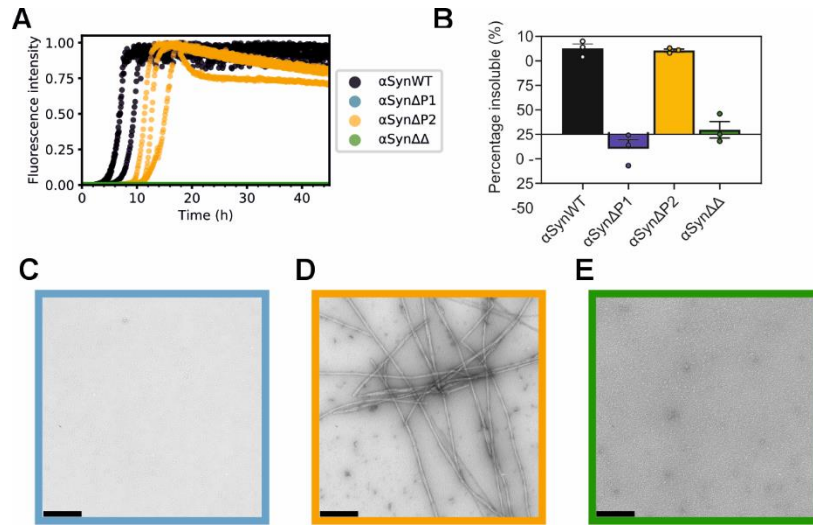

325  
326 **Fig. S1. Amyloid formation kinetics of the previously-studied deletion variants of  $\alpha$ Syn**  
327 **( $\alpha$ Syn $\Delta$ P1,  $\alpha$ Syn $\Delta$ P2, and  $\alpha$ Syn $\Delta\Delta$ ).** (A) ThT fluorescence assays with 100  $\mu$ M  $\alpha$ SynWT (black),  
328  $\alpha$ Syn $\Delta$ P1 (blue),  $\alpha$ Syn $\Delta$ P1 (yellow), and  $\alpha$ Syn $\Delta\Delta$  (green), in the presence of a Teflon bead (Methods).  
329 Conditions are the same as those used for Fig. 1. (B) Pelleting assay of the endpoint of the ThT  
330 reaction. Note that for (A) and (B) the data for  $\alpha$ SynWT reproduced from Fig. 1 for ease of comparison.  
331 (C-E) Negative-stain EM micrographs of the endpoint of the ThT assay for (C)  $\alpha$ Syn $\Delta$ P1, (D)  
332  $\alpha$ Syn $\Delta$ P2, and (E)  $\alpha$ Syn $\Delta\Delta$ . Scale bar is 250 nm.  
333

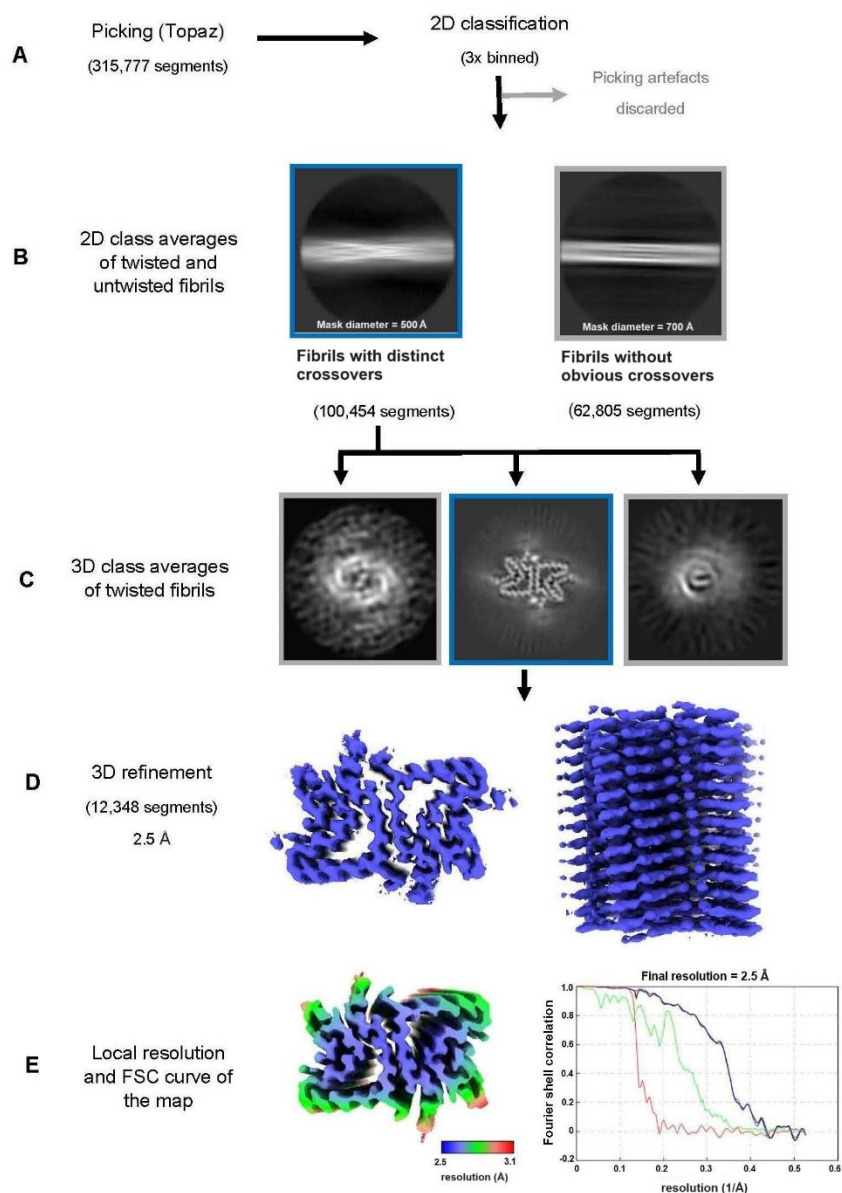

334 **Fig. S2. Processing flowchart of cryo-EM data analyses. (A)** Topaz picking and initial 2D  
 335 classification steps to remove picking artefacts. **(B)** Further 2D classifications reveal the presence of  
 336 two populations of fibrils: one with distinct crossovers, and one without. **(C)** 3D classifications of fibrils  
 337 with distinct crossover to determine helical rise and twist values. **(D)** Refinement output for  $\alpha$ Syn $\Delta$ N7  
 338 after Bayesian polishing. **(E)** Local resolution coloured map using RELION4.0 and the FSC curves  
 339 from the final refinement. The black line shows corrected deposited map, blue shows FSC masked  
 340 maps, green shows FSC unmasked maps, and red shows FSC phase randomized masked maps  
 341 values.

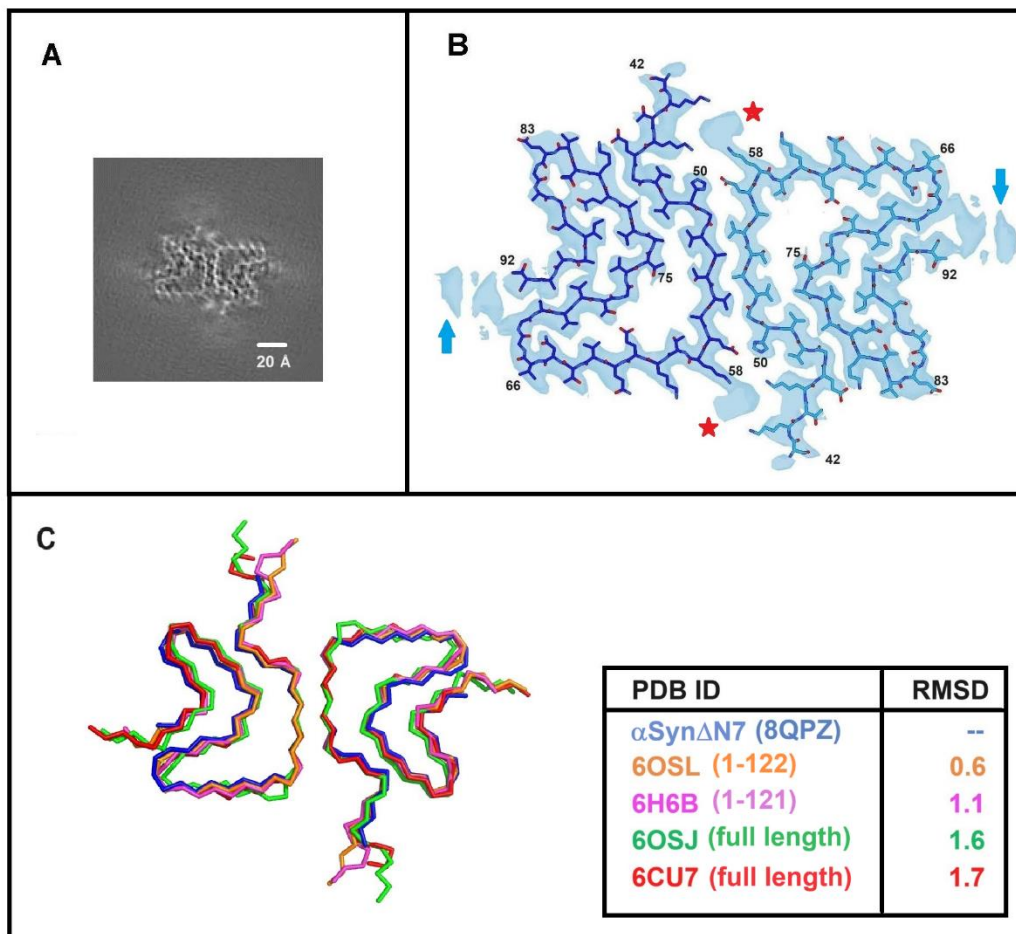

342

343 **Fig. S3.  $\alpha$ Syn $\Delta$ N7 structure and comparison to other known  $\alpha$ Syn structures.** (A) Central slice  
 344 of the resulting map from 3D classification of  $\alpha$ Syn $\Delta$ N7 amyloid fibrils. (B)  $\alpha$ Syn $\Delta$ N7 fibril structure  
 345 and associated cryo-EM map. The blue arrows indicate density of residues in the unstructured C-  
 346 terminal region which could not be modelled into the map. The red stars indicate a non-proteinaceous  
 347 density. (C) Comparison of the  $\alpha$ Syn $\Delta$ N7 fibril structure to similar previously solved structures (6, 18)  
 348 of  $\alpha$ SynWT (6OSJ, 6CU7) and its truncated variants (6OSL, 6H6B) show similar filament folds and  
 349 fibril structures. RMSD values for  $C_{\alpha}$  atoms (Å) from the best aligned chains of each structure with  
 350  $\alpha$ Syn $\Delta$ N7 are shown in the table.

351

352

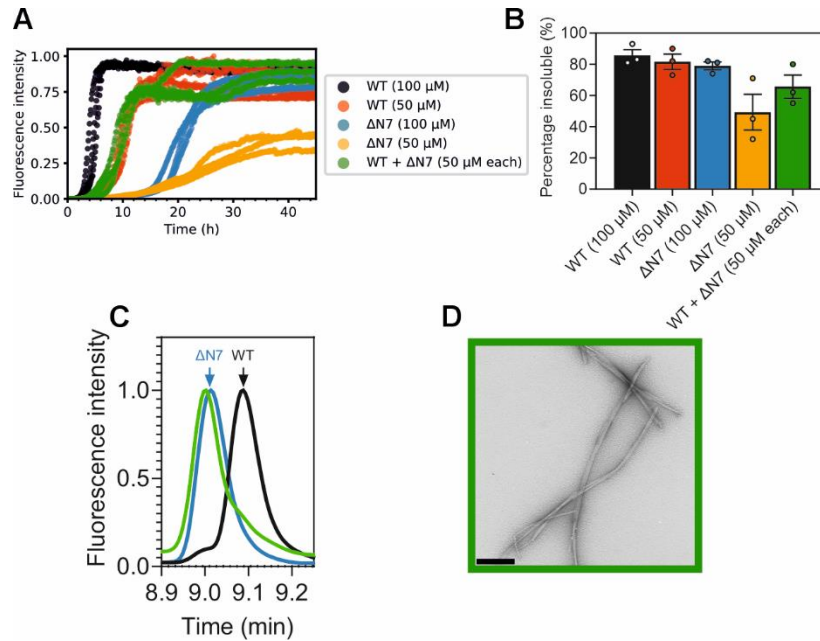

353

354 **Fig. S4. Effect of mixing  $\alpha$ SynWT and  $\alpha$ Syn $\Delta$ N7 monomers on amyloid formation. (A)** Fibril  
 355 formation kinetics of  $\alpha$ SynWT and  $\alpha$ Syn $\Delta$ N7 when co-incubated in a ThT assay. Controls used are  
 356 50  $\mu$ M and 100  $\mu$ M of each protein alone. Data are normalised to the maximum ThT signal in the  
 357 experiment. Three replicates of the experiment are shown in the plot. **(B)** Quantification of the  
 358 insoluble fraction at the endpoint of ThT assays from three biological repeats, as determined by  
 359 centrifugation and SDS-PAGE. Error bars are SEM. **(C)** RP-HPLC trace for the soluble fraction of the  
 360 endpoint of the ThT assay resulting from the co-incubation of  $\alpha$ SynWT and  $\alpha$ Syn $\Delta$ N7 (green). Profiles  
 361 of monomeric  $\alpha$ SynWT (black) and  $\alpha$ Syn $\Delta$ N7 (blue) are displayed to show that the majority of  
 362 remaining soluble protein at the end of the ThT assay for the co-incubation of 50  $\mu$ M each of  $\alpha$ SynWT  
 363 and  $\alpha$ Syn $\Delta$ N7 is  $\alpha$ Syn $\Delta$ N7. Data are normalised to the maximum intensity of each trace. **(D)** Negative-  
 364 stain EM micrograph of the ThT endpoint after co-incubation. Scale bar is 250 nm.

365

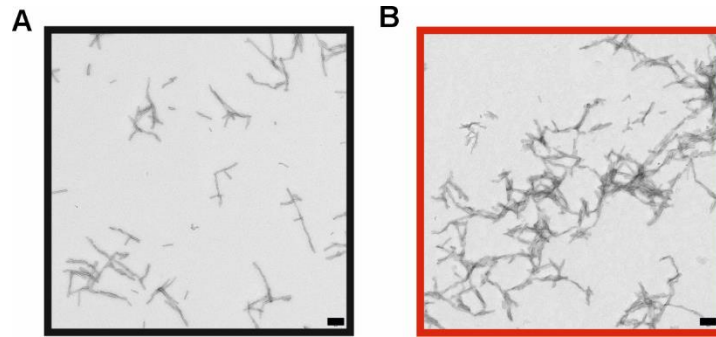

366 **Fig. S5. Negative-stain TEM images of fibril seeds. (A)**  $\alpha$ SynWT and **(B)**  $\alpha$ Syn $\Delta$ N7 fibril seeds  
367 formed by sonication of the product of fibril growth in 96 well plates. Scale bar is 250 nm.

368

369

370

371

372

373

374

375

376

377

378

379

380



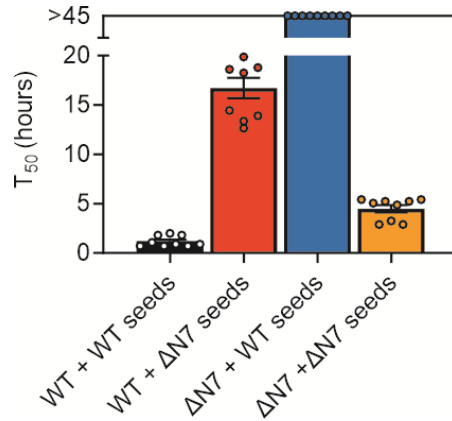

381 **Fig. S6.  $T_{50}$  values for the seeded fibril growth assays shown in Fig. 2.** Nine data points for each  
 382 reaction were taken from three biological repeats, each containing three technical replicates. For  
 383 instances when no clear plateau phase was reached, the  $T_{50}$  was recorded as >45 h. Error bars are  
 384 SEM. See also *SI Appendix*, Table S3.

385

386

387

388

389

390

391

392

393

394

395

396

397

398

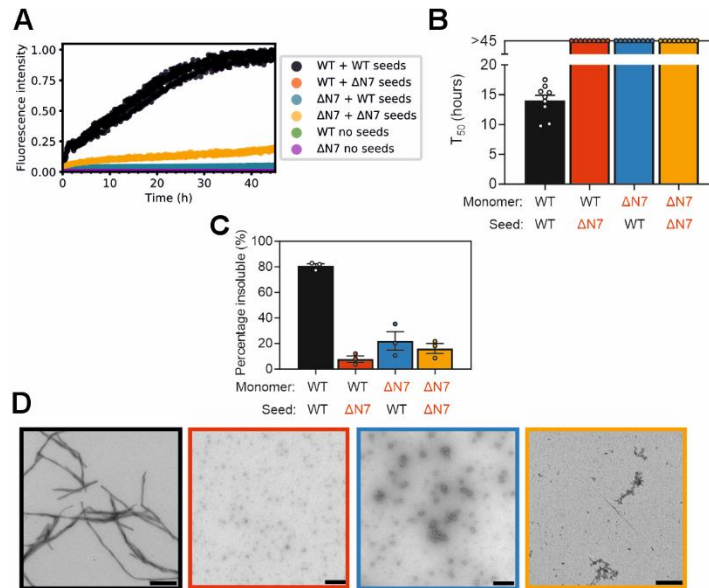

399

400 **Fig. S7. Seeded fibril growth kinetics from unsonicated fibril seeds.** (A) Seeded fibril growth for  
 401 self- and cross-seeding of  $\alpha$ SynWT and  $\alpha$ Syn $\Delta$ N7 monomers with unsonicated preformed fibril seeds  
 402 (10% (v/v)). Data are normalised to the maximum fluorescence of the dataset. Note that for 'WT no  
 403 seeds' (green) and ' $\Delta$ N7 no seeds' (purple) there is no increase in ThT fluorescence signal so the  
 404 data cannot be seen readily behind each other. (B) Corresponding  $T_{50}$  values for the unsonicated  
 405 seeding reactions. For instances when no clear plateau phase was reached, the  $T_{50}$  was recorded as  
 406 >45 h. See also *SI Appendix*, Table S4. (C) Quantification of the insoluble fraction at the endpoint of  
 407 ThT assays. (D) Negative-stain electron micrographs of the ThT endpoints, coloured as in (B). Scale  
 408 bar = 250 nm.

409

410

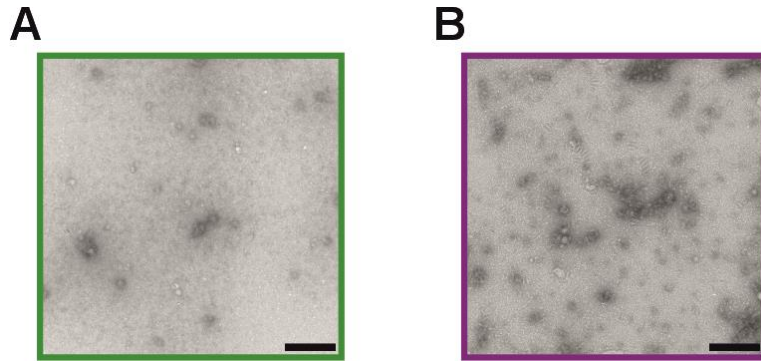

411

412 **Fig. S8. Oligomer result from unseeded quiescent incubation of  $\alpha$ SynWT and  $\alpha$ Syn $\Delta$ N7.**  
413 Representative negative stain TEM images of **(A)**  $\alpha$ SynWT and **(B)**  $\alpha$ Syn $\Delta$ N7 after quiescent  
414 incubation in PBS for 45 h at 37 °C. Scale bar = 250 nm.

415

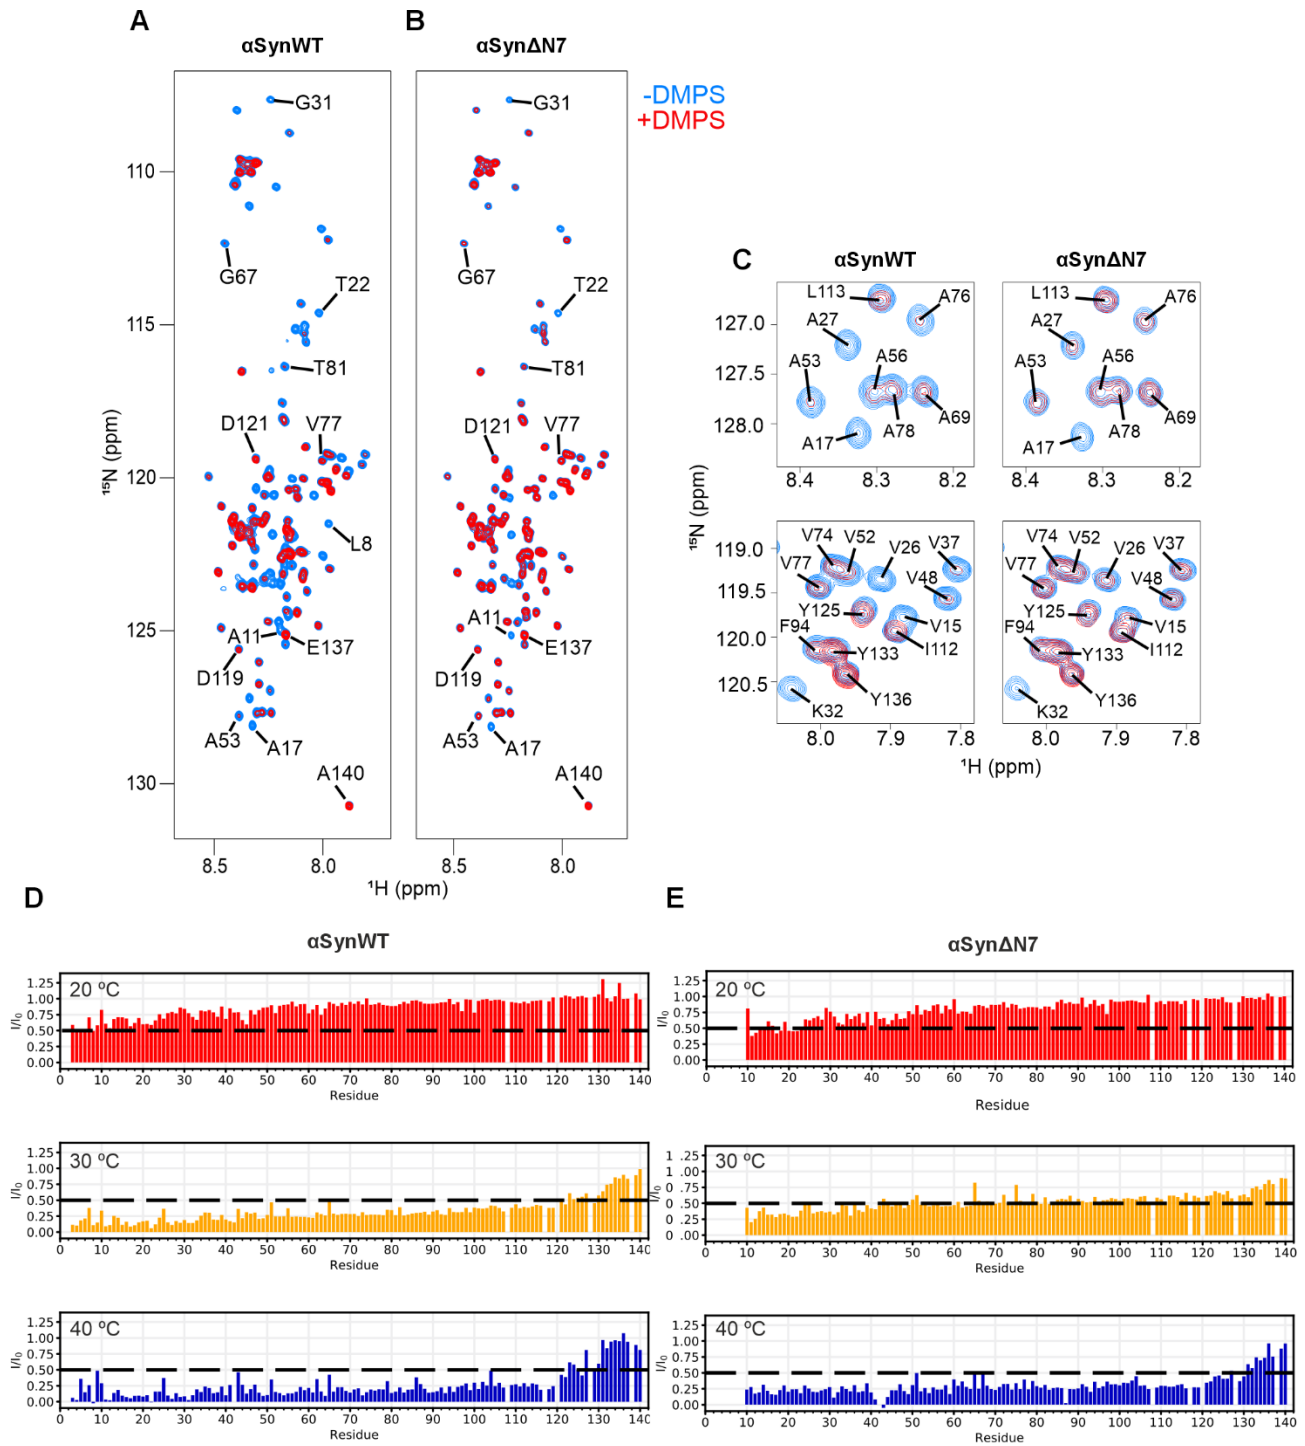

416

417 **Fig. S9.  $^1\text{H}$ - $^{15}\text{N}$  HMQC NMR spectra of  $\alpha$ SynWT and  $\alpha$ Syn $\Delta$ N7 binding to DMPS liposomes at**  
 418 **different temperatures. (A, B)  $^1\text{H}$ - $^{15}\text{N}$  HMQC spectra for  $\alpha$ SynWT and  $\alpha$ Syn $\Delta$ N7, respectively, in the**  
 419 **presence (red) or absence (blue) of DMPS liposomes, collected at 30 °C and an LPR of 8:1. (C) Zoom**  
 420 **of different regions of the spectra, with individual resonances labelled and coloured as in (A, B). (D,**

421 **E)** Intensity ratios at 20 °C (red), 30 °C (yellow), and 40 °C (blue) for  $\alpha$ SynWT and  $\alpha$ Syn $\Delta$ N7,  
422 respectively. The dashed line depicts  $I/I_0$  of 0.5. A protein concentration of 25  $\mu$ M was used and an  
423 LPR of 8:1.  
424

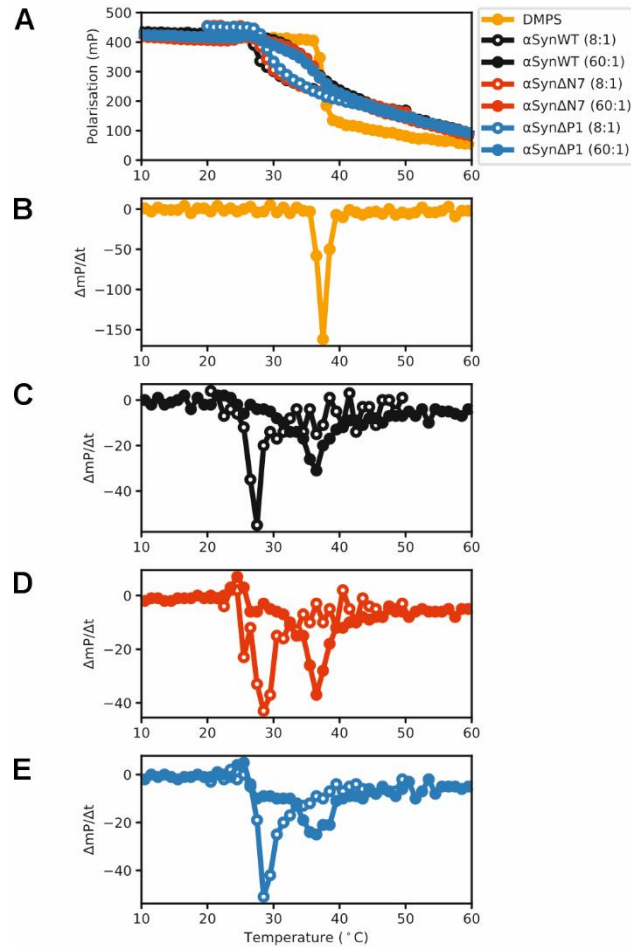

425 **Fig. S10. Monitoring DMPS membrane fluidity and lipid packing upon incubation with  $\alpha$ SynWT**  
 426 **and  $\alpha$ Syn $\Delta$ N7 monomers.** The experiments were performed using 1,6-diphenylhexa-1,3,5-triene  
 427 (DPH). **(A)** Change in DPH fluorescence polarisation in DMPS liposomes with temperature. The first  
 428 derivative of the data in **(A)** is shown for **(B)** DMPS alone or with **(C)**  $\alpha$ SynWT, **(D)**  $\alpha$ Syn $\Delta$ N7 or **(E)**  
 429  $\alpha$ Syn $\Delta$ P1 monomers at LPRs of 8:1 and 60:1 (open and closed symbols, respectively). Experimental  
 430 details are described in *SI Appendix*, Methods.

431

432

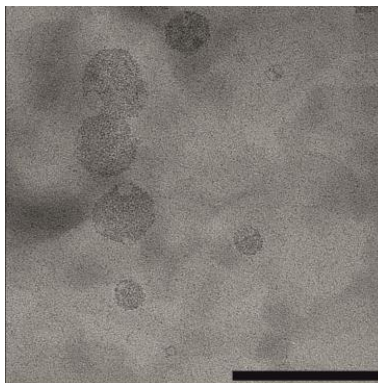

433

434 **Fig. S11. Negative-stain image of DMPS liposomes.** Samples were incubated at 30 °C for 45 h in  
435 the absence of protein. Scale bar = 250 nm.

436

437

438

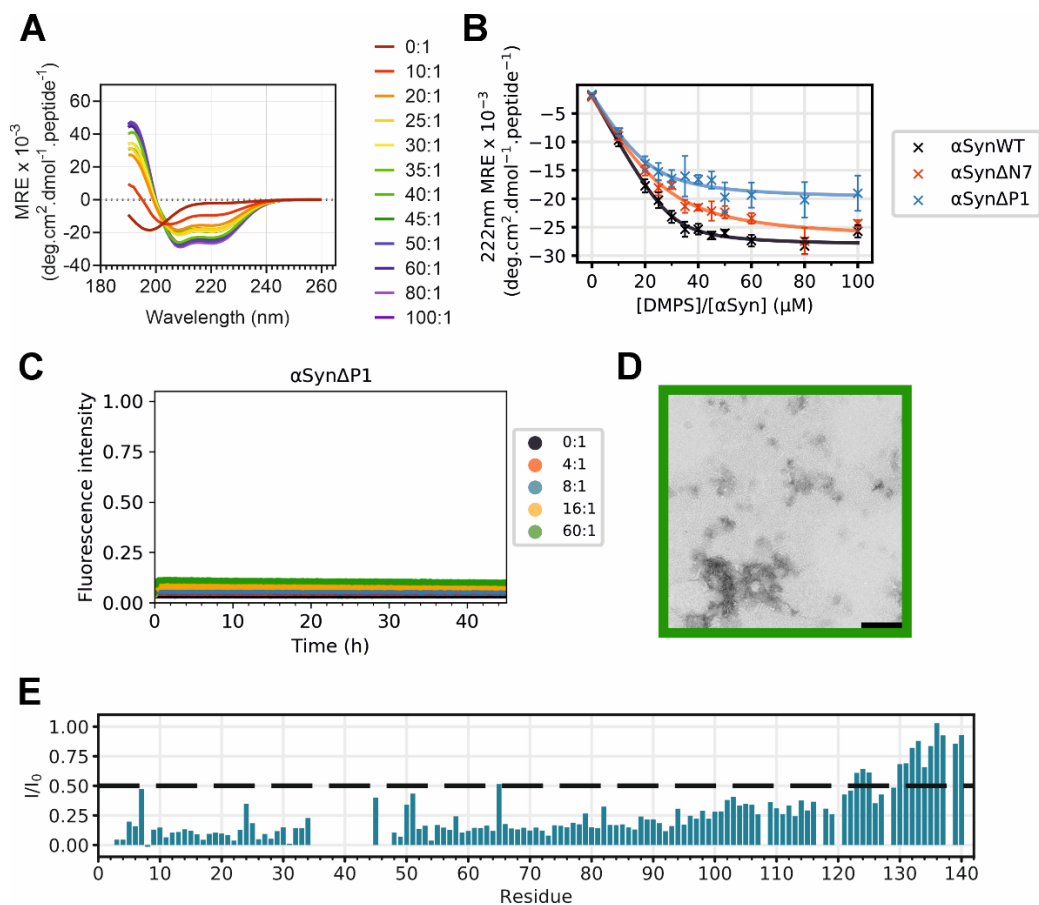

439

440

441 **Fig. S12. Characterisation of the behaviour of  $\alpha$ Syn $\Delta$ P1 in the presence of DMPS liposomes.**

442 **(A)** Far-UV CD spectra of  $\alpha$ Syn $\Delta$ P1 at different LPR values as indicated in the key. **(B)** MRE values

443 at 222 nm at different LPR values (blue). Fitting the titration data yielded values of the  $K_d$  and  $L$  values

444 of  $4.2 \pm 2.0 \mu\text{M}$  and  $22 \pm 4$  lipid molecules per molecule of  $\alpha$ Syn $\Delta$ P1. Data for  $\alpha$ Syn $\Delta$ N7 (red) and

445  $\alpha$ SynWT are reproduced from Fig. 3 for comparison. **(C)** ThT assay for  $\alpha$ Syn $\Delta$ P1 incubated at different

446 LPRs (indicated in key). Data are normalised to maximum value obtained for  $\alpha$ SynWT obtained at an

447 LPR of 16:1 (from Fig. 4A). **(D)** Negative stain electron micrograph of endpoint of incubation of DMPS

448 liposomes with  $\alpha$ Syn $\Delta$ P1 at an LPR of 60:1. Scale bar = 250 nm. **(E)** Intensity ratios for each assigned

449 resonance of  $\alpha$ Syn $\Delta$ P1 obtained from  $^1\text{H}$ - $^{15}\text{N}$  HMQC NMR experiments with or without liposomes at

450 a  $[\text{DMPS}]:[\alpha\text{Syn}\Delta\text{P1}]$  of 8:1. The dashed line is at  $I/I_0$  of 0.5. Note that residues 36-42 are deleted in

451  $\alpha$ Syn $\Delta$ P1. All experiments were obtained at  $30^\circ\text{C}$ .

452

453



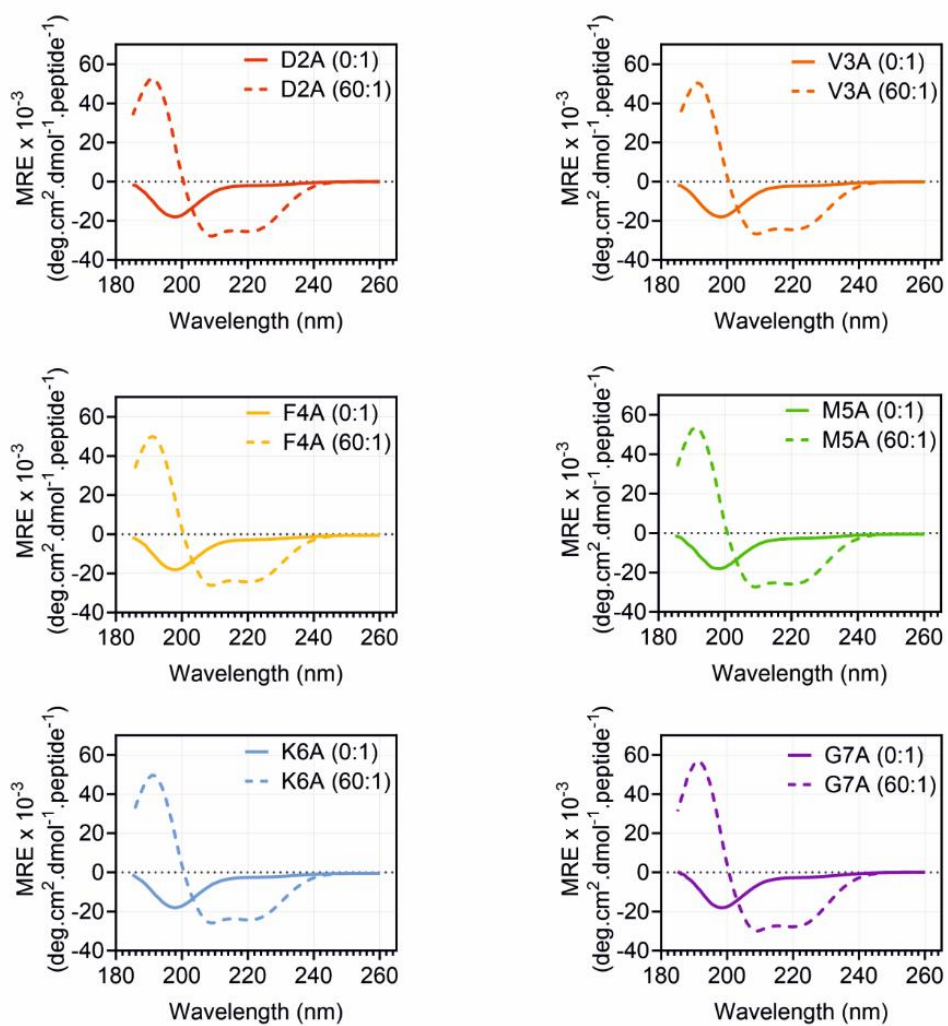

454

455 **Fig. S13. Far-UV CD spectra of alanine scan variants of  $\alpha$ Syn (residues 2-7).** Spectra were  
 456 acquired in the absence (solid line) or presence (dashed line) of DMPS liposomes. An LPR of 60:1  
 457 was used. All spectra were obtained at 30 °C.

458

459

460

461

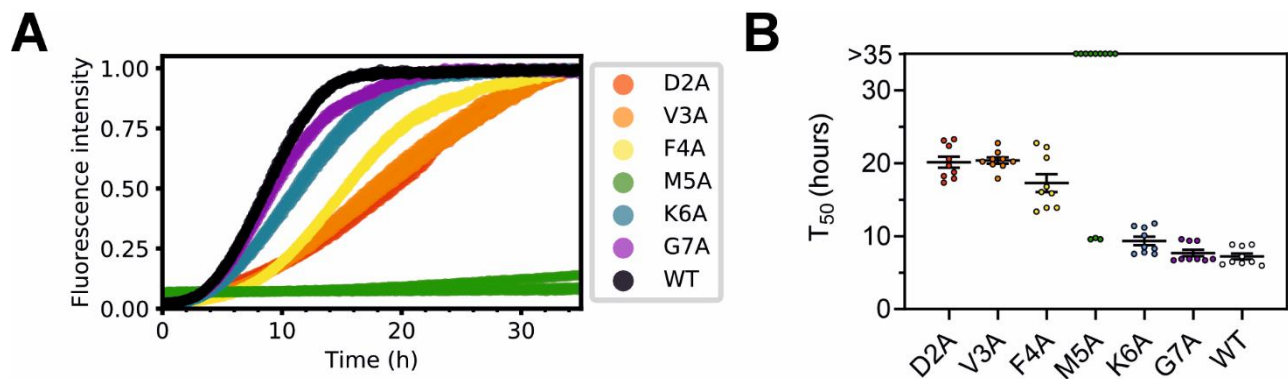

462 **Fig. S14. Fibril formation kinetics of alanine scan variants of  $\alpha$ Syn in the presence of DMPS**  
 463 **liposomes. (A)** Fibril formation kinetics for the six alanine scan variants measured by ThT  
 464 fluorescence. 50  $\mu$ M protein was incubated in the presence of DMPS liposomes at an LPR of 8:1,  
 465 30°C. Three replicates are shown for each variant. **(B)** T<sub>50</sub> values for each curve of three biological  
 466 repeats, each containing three replicates (*SI Appendix*, Table S5). Note that we present four biological  
 467 repeats for M5A (green) and in three of four biological repeats no clear plateau was reached after 35  
 468 hours and so the mean T<sub>50</sub> could not be determined. Error bars are standard error of the mean (SEM).

469

470

471

472

473

474

475

476

477

478

479

480

481

482

483

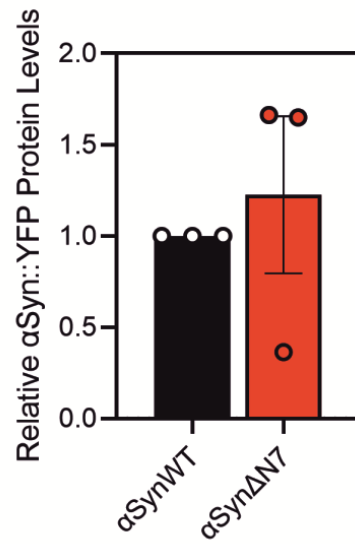

484 **Fig. S15. Densitometry of the western blots showing protein expression levels of**  
485  **$\alpha$ SynWT::YFP and  $\alpha$ Syn $\Delta$ N7::YFP in the body wall muscle cells of *C. elegans*.** Expression levels  
486 are plotted relative the expression of  $\alpha$ SynWT::YFP. Results are shown from three biological repeats  
487 and the error bars are SEM.

488

489

490

491

492

493

494

495

496

497

498

499

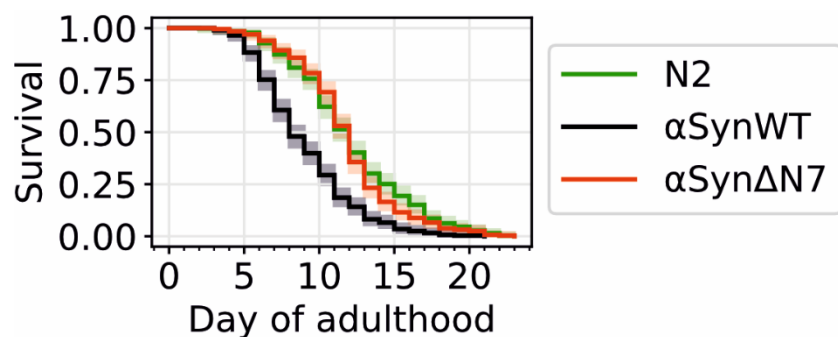

500

501

502 **Fig. S16. Kaplan-Meier plot of the lifespan of *C. elegans* strains N2 (green), αSynWT (black)**  
 503 **and αSynΔN7 (red).** n = 120-150 animals per biological repeat and the collated results of three  
 504 biological repeats are plotted. Shaded area shows the 95% confidence intervals. The median lifespan  
 505 of the strains tested were 15, 11, and 15 days of life for N2, αSynWT and αSynΔN7, respectively.  
 506 Note that the results are shown as days of adulthood (i.e. not including the 3 days of development to  
 507 adulthood). Results of the statistical analysis of the lifespans are reported in *SI Appendix*, Table S6.

508

509

510 **SI Appendix Tables and Table Legends**

511 **Table S1. Rate and yield of *de novo* amyloid fibril formation for  $\alpha$ SynWT and  $\alpha$ Syn $\Delta$ N7 *in vitro*.**

512 The mean  $T_{lag}$  and  $T_{50}$  were calculated from nine data points (three biological repeats, each containing  
513 three technical replicates). The mean percentage insoluble protein was calculated from three repeat  
514 experiments. Errors for all values are standard error of the mean. The data were acquired at pH 7.4,  
515 in 96 well plates, with agitation in the presence of a Teflon bead at 37 °C.

|                          | <b><math>\alpha</math>SynWT</b> | <b><math>\alpha</math>Syn<math>\Delta</math>N7</b> | 516 |
|--------------------------|---------------------------------|----------------------------------------------------|-----|
| $T_{lag}$ (hours)        | 5.8 $\pm$ 0.3                   | 18.6 $\pm$ 2.4                                     | 517 |
| $T_{50}$ (hours)         | 7.2 $\pm$ 0.3                   | 23.0 $\pm$ 2.5                                     |     |
| Percentage insoluble (%) | 87 $\pm$ 5                      | 85 $\pm$ 4                                         | 518 |

519

520

521

522

523

524

525

526

527

528

529

530

531

532

533 **Table S2. Cryo-EM data collection, refinement, and validation statistics for the  $\alpha$ Syn $\Delta$ N7**  
 534 **dataset**

|                                                     | <b><math>\alpha</math>Syn<math>\Delta</math>N7 fibril structure<br/>(EMDB-18570)<br/>(PDB 8QPZ)</b> |
|-----------------------------------------------------|-----------------------------------------------------------------------------------------------------|
| <b>Data collection and processing</b>               |                                                                                                     |
| Magnification                                       | 130,000                                                                                             |
| Voltage (kV)                                        | 300                                                                                                 |
| Detector                                            | Falcon4-selectris                                                                                   |
| Energy filter slit width (eV)                       | 10                                                                                                  |
| Pixel size (Å)                                      | 0.95                                                                                                |
| Electron exposure (e <sup>-</sup> /Å <sup>2</sup> ) | 45                                                                                                  |
| Exposure rate (e <sup>-</sup> /pixel/s)             | 8                                                                                                   |
| Nominal defocus range (µm)                          | -1.4 to -2.6                                                                                        |
| Movies collected                                    | 5,464                                                                                               |
| Initial particle images (no.)                       | 163,259                                                                                             |
| Final particle images (no.)                         | 12,348                                                                                              |
| Symmetry imposed                                    | C1                                                                                                  |
| Map resolution (Å)                                  | 2.5                                                                                                 |
| FSC threshold                                       | 0.143                                                                                               |
| Map resolution range (Å)                            | 2.5 Å – 3.1 Å                                                                                       |
| Helical parameters                                  |                                                                                                     |
| Helical twist (°)                                   | 179.43                                                                                              |
| Helical rise (Å)                                    | 2.44                                                                                                |
| Crossover (nm)                                      | 76                                                                                                  |
| <b>Refinement</b>                                   |                                                                                                     |
| Initial model used (PDB code)                       | 6OSL                                                                                                |
| Map sharpening <i>B</i> factor (Å <sup>2</sup> )    | -26                                                                                                 |
| Model Resolution (Å)                                | 2.4                                                                                                 |
| FSC threshold                                       | 0.143                                                                                               |
| Model to map correlation                            | 0.78                                                                                                |
| Model composition                                   |                                                                                                     |
| Non-hydrogen atoms                                  | 4116                                                                                                |
| Protein residues total                              | 612                                                                                                 |
| $\alpha$ Syn residues modelled                      | 42-92                                                                                               |
| Chains per helical layer                            | 2                                                                                                   |
| Helical layers modelled                             | 6                                                                                                   |
| <i>B</i> factors (Å <sup>2</sup> )                  |                                                                                                     |
| Protein                                             | 106                                                                                                 |
| R.m.s. deviations                                   |                                                                                                     |
| Bond lengths (Å)                                    | 0.004                                                                                               |
| Bond angles (°)                                     | 0.696                                                                                               |
| Validation                                          |                                                                                                     |
| MolProbity score                                    | 2.2                                                                                                 |
| Clashscore                                          | 9.3                                                                                                 |
| Poor rotamers (%)                                   | 8.6                                                                                                 |
| Ramachandran plot                                   |                                                                                                     |
| Favored (%)                                         | 100.0                                                                                               |
| Allowed (%)                                         | 0.0                                                                                                 |
| Disallowed (%)                                      | 0.0                                                                                                 |

535 **Table S3. Half-times ( $T_{50}$ ) and percentage insoluble protein for  $\alpha$ SynWT and  $\alpha$ Syn $\Delta$ N7 seeded**  
536 **ThT assays containing sonicated amyloid fibril seeds.** Where no clear plateau was reached after  
537 45 hours, the result is indicated by '>45'. See also Fig. 2 and *SI Appendix* Fig. S6.

|                          | <b>WT + WT<br/>seeds</b> | <b>WT + <math>\Delta</math>N7<br/>seeds</b> | <b><math>\Delta</math>N7 + WT<br/>seeds</b> | <b><math>\Delta</math>N7 + <math>\Delta</math>N7<br/>seeds</b> |
|--------------------------|--------------------------|---------------------------------------------|---------------------------------------------|----------------------------------------------------------------|
| $T_{50}$ (hours)         | $1.2 \pm 0.2$            | $16.7 \pm 1.0$                              | >45                                         | $4.5 \pm 0.4$                                                  |
| Percentage insoluble (%) | $87 \pm 2$               | $75 \pm 5$                                  | $28 \pm 10$                                 | $70 \pm 5$                                                     |

538

539

540

541

542

543

544

545

546

547

548

549

550

551

552

553

554

555 **Table S4. Half-times ( $T_{50}$ ) and percentage insoluble protein for  $\alpha$ SynWT and  $\alpha$ Syn $\Delta$ N7 seeded**  
556 **ThT assays using unsonicated amyloid fibril seeds.** Where no clear plateau was reached after  
557 45 hours, result is indicated by '>45'.

|                          | <b>WT + WT<br/>seeds</b> | <b>WT + <math>\Delta</math>N7<br/>seeds</b> | <b><math>\Delta</math>N7 + WT<br/>seeds</b> | <b><math>\Delta</math>N7 + <math>\Delta</math>N7<br/>seeds</b> |
|--------------------------|--------------------------|---------------------------------------------|---------------------------------------------|----------------------------------------------------------------|
| $T_{50}$ (hours)         | 14.0 $\pm$ 0.9           | >45                                         | >45                                         | >45                                                            |
| Percentage insoluble (%) | 81 $\pm$ 2               | 8 $\pm$ 2                                   | 22 $\pm$ 7                                  | 16 $\pm$ 4                                                     |

561

562

563

564

565

566

567

568

569

570

571

572

573

574

575

576



577 **Table S5. Half-times ( $T_{50}$ ) for alanine scan variants in the lipid-dependent ThT assays.** For the  
578 M5A variant, the  $T_{50}$  could not be determined from the data collected, this is indicated by 'N/D'.

|              | <b>D2A</b> | <b>V3A</b> | <b>F4A</b> | <b>M5A</b> | <b>K6A</b> | <b>G7A</b> | <b>WT</b> |
|--------------|------------|------------|------------|------------|------------|------------|-----------|
| $T_{50}$ (h) | 19.3 ± 0.5 | 19.6 ± 0.6 | 16.9 ± 1.1 | N/D        | 9.3 ± 0.6  | 7.7 ± 0.4  | 7.2 ± 0.4 |

579

580

581

582

583

584

585

586

587

588

589

590

591

592

593

594

595

596

597

598 **Table S6. Statistical significance of the difference in lifespan between N2,  $\alpha$ SynWT::YFP and**  
599  **$\alpha$ Syn $\Delta$ N7::YFP strains.** A log-rank test followed by a post-hoc Bonferroni correction was used to  
600 compare each of the strains. (\*\*\*\*) =  $p < 0.0001$ . (n.s. = not significant).

| <b>Compared strains</b>                    | <b>p-value (Bonferroni corrected)</b> | 601 |
|--------------------------------------------|---------------------------------------|-----|
| N2 vs $\alpha$ SynWT                       | 1.14E-27 (****)                       | 602 |
| N2 vs $\alpha$ Syn $\Delta$ N7             | 0.621806 (n.s.)                       | 603 |
| $\alpha$ SynWT vs $\alpha$ Syn $\Delta$ N7 | 3.08E-25 (****)                       | 604 |

605

606 **SI References**

- 607 1. K. Gade Malmos, *et al.*, ThT 101: a primer on the use of thioflavin T to investigate amyloid formation.  
608 *Amyloid* **24**, 1–16 (2017).
- 609 2. D. Kimanius, L. Dong, G. Sharov, T. Nakane, S. H. W. Scheres, New tools for automated cryo-EM single-  
610 particle analysis in RELION-4.0. *Biochem. J.* **478**, 4169–4185 (2021).
- 611 3. A. Rohou, N. Grigorieff, CTFIND4: Fast and accurate defocus estimation from electron micrographs. *J.*  
612 *Struct. Biol.* **192**, 216–221 (2015).
- 613 4. T. Bepler, *et al.*, Positive-unlabeled convolutional neural networks for particle picking in cryo-electron  
614 micrographs. *Nat. Methods* **16**, 1153–1160 (2019).
- 615 5. S. H. W. Scheres, Amyloid structure determination in RELION-3.1. *Acta Crystallogr. D Struct. Biol.* **76**,  
616 94–101 (2020).
- 617 6. X. Ni, R. P. McGlinchey, J. Jiang, J. C. Lee, Structural insights into  $\alpha$ -synuclein fibril polymorphism:  
618 Effects of Parkinson’s disease-related C-terminal truncations. *J. Mol. Biol.* **431**, 3913–3919 (2019).
- 619 7. P. Emsley, B. Lohkamp, W. G. Scott, K. Cowtan, Features and development of Coot. *Acta Crystallogr. D*  
620 *Biol. Crystallogr.* **66**, 486–501 (2010).
- 621 8. P. D. Adams, *et al.*, PHENIX: a comprehensive Python-based system for macromolecular structure  
622 solution. *Acta Crystallogr. D Biol. Crystallogr.* **66**, 213–221 (2010).
- 623 9. C. J. Williams, *et al.*, MolProbity: More and better reference data for improved all-atom structure  
624 validation. *Protein Sci.* **27**, 293–315 (2018).
- 625 10. C. Galvagnion, *et al.*, Lipid vesicles trigger  $\alpha$ -synuclein aggregation by stimulating primary nucleation.  
626 *Nat. Chem. Biol.* **11**, 229–234 (2015).
- 627 11. Y. Wei, A. A. Thyparambil, R. A. Latour, Protein helical structure determination using CD spectroscopy  
628 for solutions with strong background absorbance from 190-230 nm. *Biochim. Biophys. Acta* **1844**,  
629 2331–2337 (2014).
- 630 12. W. F. Vranken, *et al.*, The CCPN data model for NMR spectroscopy: Development of a software  
631 pipeline. *Proteins.* **59**, 687–696 (2005).
- 632 13. C. R. Bodner, A. S. Maltsev, C. M. Dobson, A. Bax, Differential phospholipid binding of alpha-synuclein  
633 variants implicated in Parkinson’s disease revealed by solution NMR spectroscopy. *Biochem.* **49**, 862–  
634 871 (2010).
- 635 14. K. Trainor, J. A. Palumbo, D. W. S. MacKenzie, E. M. Meiering, Temperature dependence of NMR  
636 chemical shifts: Tracking and statistical analysis. *Protein Sci.* **29**, 306–314 (2020).
- 637 15. T. Parasassi, G. De Stasio, R. M. Rusch, E. Gratton, A photophysical model for diphenylhexatriene  
638 fluorescence decay in solvents and in phospholipid vesicles. *Biophys. J.* **59**, 466–475 (1991).

- 639 16. C. I. Nussbaum-Krammer, M. F. Neto, R. M. Brielmann, J. S. Pedersen, R. I. Morimoto, Investigating the  
640 spreading and toxicity of prion-like proteins using the metazoan model organism *C. elegans*. *JoVE*,  
641 e52321 (2015).
- 642 17. C. Davidson-Pilon, lifelines: survival analysis in Python. *JOSS* **4**, 1317 (2019).
- 643 18. B. Li, *et al.*, Cryo-EM of full-length  $\alpha$ -synuclein reveals fibril polymorphs with a common structural  
644 kernel. *Nat. Commun.* **9**, 3609 (2018).
- 645
